# Supplementary material for: REST contributes to AKI-to-CKD transition through inducing ferroptosis in renal tubular epithelial cells
Source: PubMed Central journal article supplement (PMC10393228; doi:10.1172/jci.insight.166001), 2023-06-08
Supplement: jciinsight-8-166001-s077.pdf [file jciinsight-8-166001-s077.pdf]

# Supplemental Information

## This PDF file includes:

1. Supplemental text
2. Supplemental Tables 1 to 9
3. Supplemental Figures 1 to 13
4. References

## Supplemental text

### 1. Materials and Methods

*Drug treatment.* In vitro experiments of HK2 cells: the following reagents were used at indicated concentrations: Erastin (MedChemExpress, HY-15763, New Jersey, USA), RSL3 (MedChemExpress, HY-100218A), Deferoxamine (MedChemExpress, HY-B0988), Ferrostatin-1 (Selleckchem, S7243, Houston, TX, USA), Z-VAD-FMK (Selleckchem, S7023), 3-Methyladenine (Selleckchem, S2767), Necrostatin-1 (Selleckchem, S8037). In HT 1080 cells, RSL3 (MedChemExpress, HY-100218A) was used to induce ferroptosis.

*IRI and Cisplatin induced mouse models.* Mice were randomly assigned to sham or IRI groups. n = 8 mice per group. After skin antisepsis, mice were anesthetized and kept on a homeothermic plate. After exposing both kidneys, the IRI-induced AKI was established in mice by inducing ischemia for 30 min by clamping the renal pedicle with nontraumatic bulldog clamps, followed by 24 h blood reperfusion. Ferrostatin-1 was

24 intraperitoneally injected to *Rest*<sup>RTKO</sup> mice and *Rest*<sup>fl/fl</sup> mice on the onset of reperfusion  
25 to evaluate the additional benefits of ferrostatins and REST-deficiency in AKI(1, 2).  
26 For the IRI-induced AKI to CKD model, bilateral renal ischemia for 35 min was  
27 followed by reperfusion for 2 or 4 weeks. The same operations were conducted in sham  
28 groups except for induction of IRI.  
29 To construct the cisplatin-induced AKI model, 30 mg/kg of cisplatin was  
30 intraperitoneally injected into mice and they were sacrificed 3 days later, as described  
31 previously (3). Blood samples and kidneys were collected at the indicated times. One  
32 kidney was fixed in 4% paraformaldehyde for histological analyses, while the other  
33 was snap-frozen for subsequent molecular analysis.  
34 *Renal function, histology, immunofluorescence and immunohistochemical staining.*  
35 Serum creatinine and BUN were determined to monitor renal function. Creatinine was  
36 measured by using high-performance liquid chromatography (Waters, MA, USA).  
37 BUN was measured using a urea assay kit (Nanjing Jiancheng Bioengineering Institute,  
38 Nanjing, China). The paraffin-embedded kidney was cut into a thickness of 5 μm  
39 sections and was stained with hematoxylin-eosin (HE), Masson, or used for  
40 immunohistochemistry and immunofluorescence. Tubular injury was evaluated in a  
41 blinded manner and random tissue sections were assessed based on the percentage of  
42 damaged tubules: 0, no damage; 1, < 25%; 2, 25–50%; 3, 50–75%; 4, > 75% (4).  
43 Results for each item were added to yield the ATN score, and images were obtained  
44 with a Digital slice scanner (Kfbio Technology of Health, Ningbo, China).

45 Immunofluorescence staining were observed by Zeiss 880 (Carl Zeiss AG, Germany).  
46 The intensities of the images were detected by Image J software (National Institutes of  
47 Health, USA).

48 The antibodies against 4HNE (ab48506), Fibronectin (ab2413) and  $\alpha$ -SMA (ab5694)  
49 were bought from Abcam Biotechnology (Cambridge, MA, USA). The antibody  
50 against REST (2590-R) was obtained from Bioss (Beijing, China). LTL was bought  
51 from vector Laboratories Inc (San Francisco, California, USA).

52 *Cell culture and treatment.* Human proximal tubular epithelial cells (HK2 cells), rat  
53 renal tubular epithelial cells (NRK52E cells) and Human fibrosarcoma cells (HT1080  
54 cells) were bought from the American Tissue Culture Collection (ATCC, Manassas,  
55 VA, USA). HK2 cells were cultured in F12 medium containing 10% fetal bovine serum  
56 (Mediatech Inc., Herndon, VA, USA). NRK52E cells and HT1080 cells were cultured  
57 in DMEM medium containing 10% fetal bovine serum (Mediatech).

58 HR model of HK2, primary renal tubular epithelial cells of mice and NRK52E cells  
59 was induced according to 24h hypoxia (94% N<sub>2</sub> + 1% O<sub>2</sub> + 5%CO<sub>2</sub>, glucose and serum-  
60 free DMEM/F12 medium) followed by 1h, 3h, 6h, 9h, 12h of reoxygenation (95% air  
61 and 5% CO<sub>2</sub>, DMEM/F12 medium with 10% FBS.

62 For cisplatin injury model, cells were incubated with cisplatin for 24 h.

63 *Mouse primary tubule isolation and cell culture.* Tubular epithelial cells (TECs) were  
64 isolated from 4-week-old WT or *Rest*<sup>*fl/fl*</sup> male mice kidneys as previous described (5)  
65 (6). Kidneys were collected immediately after the mice were sacrificed. Renal cortexes

66 were minced into pieces ( $\sim 1 \text{ mm}^3$ ) and washed by 0.1 ml ice-cold Dulbecco's  
67 phosphate buffered saline (DPBS). Fragments were digested with 0.1% Collagenase II  
68 for 8 minutes. After digestion, DMEM/F12 medium (containing 10% of fetal bovine  
69 serum (FBS)) were added to stop the Collagenase activity. Then the tissue homogenate  
70 was sieved through 70  $\mu\text{m}$  nylon mesh (BD Falcon, Franklin Lakes, NJ, USA) and  
71 centrifuged. Cells were centrifuged at 1000 rpm for 3 minutes. These renal tubules were  
72 collected after an ultracentrifugation density gradient. Cells were washed with DPBS  
73 and was resuspended in DMEM/F12 medium with 10% fetal bovine serum (Corning,  
74 NY, USA). To obtain *REST*<sup>-/-</sup> primary tubule epithelial cells, Ad-Cre adenovirus  
75 (HANBio, AP21031807, Shanghai, China) were used to infect cells for 72h. Infection  
76 efficiency was estimated under fluorescence microscope by the presence of GFP-  
77 positive cells (data not shown).

78 *Overexpression or downregulation of target genes.* For interfere *REST* or *GCLM*, HK2  
79 cells or primary renal tubular epithelial cells of mice were transfected with control  
80 siRNA or siRNA against *REST* or *GCLM* by using Lipofectamine 3000 (Invitrogen,  
81 Carlsbad, CA, USA), according to the manufacturer's protocol. The siRNA sequences  
82 are described in Supplemental Table 3. Control or *REST* overexpression plasmids were  
83 transfected using Lipofectamine 3000 (Invitrogen, L3000075) in Opti-MEM (Hyclone,  
84 Logan, UT, USA), according to the manufacturer's protocol. Then, cells were treated  
85 with HR and were harvested for the subsequent experiments.

86 *RNA extraction and quantitative real-time PCR.* Total RNA was extracted from HK2  
87 cells, NRK52E cells, primary renal tubular epithelial cells of the mouse kidney tissues  
88 by using an RNA Purified Total RNA Extraction Kit (Beyotime Biotechnology,  
89 R0077S, Shanghai, China) according to the manufacturer's instructions and reversely  
90 transcribed into cDNA using an RT Master Mix for qPCR kit (MedChemExpress, HY-  
91 K0511A). Real-time PCR was performed with a SYBR Green qPCR kit  
92 (MedChemExpress, HY-K0501). Primers are described in Supplemental Table 4, 5 and  
93 6. Each experiment was performed at least three times.

94 *Generation of inducible GPX4 knockdown cellular model for ferroptosis.* The  
95 knockdown of *GPX4* in HK2 cells (iGPX4KD) was obtained by lentiviral infection  
96 using Tet-pLKO-puro vector with a cloned sequence of shRNA specific for *GPX4*  
97 (RabbitBio, Chengdu, China) (7). The shRNA sequences are described in Supplemental  
98 Table 7. The obtained pool of cells was selected with 2  $\mu$ M Puromycin (Beyotime  
99 Biotechnology, ST551). Next, cells were seeded at 1 cell/well in a 96-well plate in the  
100 presence of the selecting antibiotic. Growing clones were screened for ferroptotic cell  
101 death induction upon doxycycline (Dox) incubation (Selleckchem, S5159) and the most  
102 potent clone was selected for further experiments. For these experiments, iGPX4KD  
103 cells were induced for 48 hours in the presence of 1  $\mu$ M Dox (Selleckchem, S5159). 1  
104  $\mu$ M fer-1 was co-incubated with Dox for a positive control. siRNAs against REST were  
105 transfected 48 hours before Dox induction.

106 *Western Blot.* Briefly, protein samples were boiled for 15 min, electrophoresed in 8-12%  
107 SDS polyacrylamide gel, and transferred onto PVDF membranes (Merck Millipore,  
108 Billerica, MA, USA). The blots were blocked with Quick block solution (Beyotime  
109 Biotechnology, P0252) for 30 minutes at 37 °C. Then the corresponding primary and  
110 secondary antibodies were incubated to visualize the protein. The signal was detected  
111 by an enhanced chemiluminescence reagent (ProteinSimple, Santa Clara Valley, CA,  
112 USA). The densitometry of protein bands was quantified through Image J software  
113 (National Institutes of Health, USA).

114 The antibody against GCLM (ab126704), DHFR (ab288373), Lamin B1 (ab16048),  
115 Fibronectin (ab2413), GSDMD (ab209845) and pro-caspase1+p10+p12 (ab179515)  
116 were bought from Abcam (Cambridge, MA, UK). The antibodies against GPX4  
117 (381958),  $\beta$ -actin (T200068-8F10), and ACSL4 (R24265) were obtained from  
118 Zenbio(Chengdu, China). The antibody against REST (07-579) was obtained from  
119 Merck Millipore. The antibodies against GCLC (12601-1-AP),  $\alpha$ -SMA (14395-1-AP)  
120 were obtained from proteintech (Wuhan, China) and the antibody against FSP1 (sc-  
121 377120) was obtained from Santa Cruz Biotechnology (Dallas, TX, USA). LC3  
122 (12741), P62 (5114), Bcl-2 (3498) and Bax (2772) were obtained from Cell Signaling  
123 Technology (CST, Danvers, MA, USA).

124 *LDH, MDA, GSH and GCL activity levels assay.* The relative LDH, MDA, GSH and  
125 GCL activity concentration in kidney tissues and cells was assessed with LDH (Solarbio,  
126 BC0685, Beijing, China) or MDA (Beyotime Biotechnology, S0131S) or GSH

127 (Nanjing Jiancheng Bioengineering Institute, A006-1-1), or GCL activity assay kit  
128 (Sangon, D799622) according to the manufacturer's instructions. Individual contents  
129 of MDA, GSH, and GCL activity were measured at 532, 412 and 660 nm. Total protein  
130 concentration was measured using the BCA method (Beyotime Biotechnology, P0009)  
131 at 532 nm respectively with a microplate reader.

132 *Cell viability assay.* HK2 cells were seeded into 96-well plates at 3000 cells per well.  
133 After treatment, the cell viability was measured by using the cell counting kit-8 (CCK-  
134 8) assay (MedChemExpress, HY-K0301). 100  $\mu$ l of fresh medium containing 10  $\mu$ l of  
135 CCK-8 solution was added to the cells, followed by incubation for 2 h at 37 °C. The  
136 absorbance at 450 nm was measured at indicated times.

137 *ROS and Lipid ROS assay using flow cytometer.* After exposed to HR injury, cells were  
138 washed with serum-free DMEM and incubated with DCFH-DA (Beyotime  
139 Biotechnology, S0033M) or BODIPY-C11 dye (Invitrogen, D3861) at 37 °C for 20 min.  
140 Both ROS and lipid ROS were analyzed using Accuri C6 flow cytometry (BD  
141 Biosciences, Franklin Lake, NJ, USA). The data were calculated by using the FlowJo  
142 Software.

143 *PI/Calcein-AM staining.* HK2 cells or HT1080 cells were washed with PBS and  
144 incubated with PI/Calcein-AM (Meilunbio, Dalian, China) at 37 °C for 30min after they  
145 were exposed to HR injury or treated with drugs. Then cells were observed by Zeiss  
146 880 (Carl Zeiss AG, Germany).

147 *Construction of reporter plasmids and point mutation.* Putative REST binding sites in  
148 the *GCLM* promoter region are listed in Supplemental Table 8. Various lengths of the  
149 human *GCLM* promoter region were amplified by PCR using the genomic DNA of  
150 HK2 cells as a template. The fragments including *GCLM-2000* (−2000 to +200),  
151 *GCLM-1700* (−1700 to +200), *GCLM-1000* (−1000 to +200), *GCLM-500* (−500 to  
152 +200), *GCLM-200* (−200 to +200), and *GCLM-100* (−100 to +200) were separately  
153 cloned into a pGL3-basic vector (Promega, Madison, WI, USA) after digestion with  
154 HindIII, and the recombinant reporter plasmids were separately named as pGL3-  
155 *GCLM-P6*, pGL3-*GCLM-P5*, pGL3-*GCLM-P4*, pGL3-*GCLM-P3*, pGL3-*GCLM-P2*,  
156 and pGL3-*GCLM-P1*. The pGL3-*GCLM-M2*, containing point mutations in the REST  
157 binding element (GCCGCAAGCAAAGAGCCAATC, the mutated bases are  
158 underlined), was generated with MutanBEST kit (Takara) using pGL3-*GCLM-P2*  
159 (−200 to +200) as a template. Negative control mutation plasmid pGL3-*GCLM-M3*,  
160 containing point mutations in the *GCLM* binding element  
161 (CGAGCGGCAGAGGGAGTCC, the mutated bases are underlined), was also  
162 generated, using pGL3-*GCLM-P2* (−500 to +200) as a template.

163 *Luciferase reporter constructs and dual-luciferase reporter assay.* The recombinant  
164 reporter plasmids were co-transfected with pcDNA3.1 vector (Promega, Madison,  
165 Wisconsin, USA) or *REST* overexpression plasmids and Renilla plasmids into renal  
166 tubular epithelial cells using Lipofectamine 3000. Luciferase activity was detected



167 using The Dual-Luciferase Reporter Assay System (Promega, E1910). Firefly  
168 luciferase activity was normalized against Renilla activity.

169 *ChIP and ChIP-qPCR.* ChIP assays were performed by using a Simple Enzymatic ChIP  
170 Kit (Invitrogen, No. 26157) according to the manufacturer's instructions. After  
171 treatment, cells were fixed by 1% formaldehyde for 10 min. Next, cells were lysed in  
172 sodium dodecyl sulfate lysis buffer. The resulting chromatin was sonicated to shear  
173 DNA to an average length between 200 to 1000 bp, and immunoprecipitated with 3  $\mu$ g  
174 of primary antibody against REST overnight. Non-specific IgG was used as a technical  
175 control. The precipitated DNA was amplified by PCR and qPCR with primers (−203 to  
176 −43) that covered the REST binding sites (−152 to −132). Total DNA (Input) served as  
177 a positive control. The immunoprecipitated DNA was analyzed by qPCR, for which the  
178 specific primers are listed in Supplemental Table 9.

179 *RNA-Seq Profiling.* Total RNA was extracted from HK2 cells using a TaKaRa RNAiso  
180 Plus reagent. Library construction and RNA sequencing were conducted by Majorbio.  
181 Briefly, cells were divided into three groups: (1) control, (2) HR control, and (3) HR  
182 +*siREST*, each with four repeats. A total amount of 1  $\mu$ g RNA per sample was used as  
183 input material for RNA sample preparations. Sequencing libraries were generated using  
184 a TruSeq<sup>TM</sup> RNA sample preparation Kit (Illumina Inc., San Diego, CA, USA)  
185 according to the manufacturer's recommendations, and index codes were added to  
186 attribute sequences to each sample. mRNA was isolated according to the polyA  
187 selection method by oligo(dT) beads and then fragmented by fragmentation buffer.

188 Next, double-stranded cDNA was synthesized using a SuperScript double-stranded  
189 cDNA synthesis kit (Invitrogen) with random hexamer primers (Illumina).  
190 Subsequently, the synthesized cDNA was subjected to end-repair, phosphorylation, and  
191 ‘A’ base addition according to Illumina’s library construction protocol. After quantified  
192 by TBS380, the paired-end RNA-seq sequencing library was sequenced with an  
193 Illumina HiSeq xten/NovaSeq 6000 sequencer ( $2 \times 150$  bp read length).  
194 Gene Ontology (GO) enrichment analysis of differentially expressed genes and KEGG  
195 pathways were implemented by the cluster profile R package, in which gene length bias  
196 was corrected. Transcripts expression with  $|\text{Log}_2 \text{Fc}| > 1.5$ , and  $P$  values  $< 0.05$  were  
197 deemed statistically significant.

198 *Mitochondrial morphology observation by transmission electron microscopy.* Briefly,  
199  $1 \text{ mm}^3$  fresh renal cortex or primary renal tubular epithelial cells or HK2 cells aggregate  
200 was quickly placed in an electron microscopy fixative at  $4^\circ\text{C}$ . Tissues were embedded  
201 and cut into 60–80 nm ultrathin sections and then subjected to uranium lead double  
202 staining. Transmission electron microscopy was used to observe the mitochondria and  
203 image acquisition (8).

204 *Bioinformatics analysis.* The binding sites of REST in *GCLM* promoter region were  
205 predicted by using the JASPAR database (<http://jaspar.genereg.net>) (9).

206 **2. Supplemental Tables**

207 **Supplemental Table 1. Clinical data of ATN and non-ATN patients examined.**

208 **Control subjects**

| Number | Age(year) | Sex | Scr (mg/dL) | BUN (mg/dL) |
|--------|-----------|-----|-------------|-------------|
| 1      | 35        | M   | 0.8937      | 16.576      |
| 2      | 18        | M   | 0.5984      | 18.004      |
| 3      | 53        | F   | 0.7783      | 14.224      |
| 4      | 22        | F   | 0.6912      | 11.676      |
| 5      | 50        | M   | 0.6980      | 10.248      |
| 6      | 43        | F   | 0.9830      | 13.972      |
| 7      | 46        | M   | 0.7998      | 16.436      |
| 8      | 25        | F   | 0.8948      | 16.240      |
| 9      | 17        | M   | 0.8903      | 14.588      |
| 10     | 50        | F   | 0.9921      | 15.344      |
| 11     | 53        | M   | 0.8360      | 7.448       |
| 12     | 37        | F   | 0.6787      | 11.312      |
| 13     | 48        | M   | 0.9661      | 10.024      |
| 14     | 44        | M   | 0.8688      | 16.016      |
| 15     | 49        | F   | 0.9434      | 9.912       |
| 16     | 49        | F   | 0.9570      | 13.552      |
| 17     | 54        | F   | 0.8009      | 11.004      |
| 18     | 49        | F   | 0.8088      | 12.964      |
| 19     | 30        | M   | 0.7613      | 18.480      |
| 20     | 54        | M   | 0.6618      | 8.036       |
| 21     | 33        | M   | 0.5803      | 10.808      |
| 22     | 50        | M   | 0.7081      | 13.244      |
| 23     | 46        | F   | 0.8111      | 12.964      |
| 24     | 25        | F   | 0.6821      | 13.608      |
| 25     | 37        | M   | 0.8812      | 13.804      |
| 26     | 51        | F   | 0.9740      | 10.612      |
| 27     | 19        | F   | 0.6210      | 12.992      |
| 28     | 31        | M   | 0.5339      | 10.612      |
| 29     | 19        | F   | 0.6041      | 12.880      |
| 30     | 60        | M   | 0.8699      | 8.512       |
| 31     | 50        | M   | 0.7443      | 9.436       |
| 32     | 50        | F   | 0.6052      | 14.028      |
| 33     | 47        | F   | 0.6844      | 7.980       |
| 34     | 57        | F   | 0.6810      | 10.864      |

209

210

**Subjects with acute tubular necrosis**

| Number | Age(year) | Sex | Scr (mg/dL) | BUN (mg/dL) |
|--------|-----------|-----|-------------|-------------|
| 1      | 42        | F   | 1.0769      | 21.504      |
| 2      | 54        | F   | 1.4016      | 40.908      |
| 3      | 52        | F   | 3.9265      | 35.896      |
| 4      | 42        | F   | 1.3710      | 17.444      |
| 5      | 50        | M   | 1.4163      | 16.240      |
| 6      | 53        | F   | 1.2161      | 11.032      |
| 7      | 60        | F   | 2.7738      | 64.064      |
| 8      | 25        | M   | 2.5860      | 43.932      |
| 9      | 35        | M   | 2.4864      | 30.268      |
| 10     | 40        | M   | 2.8462      | 35.672      |
| 11     | 59        | M   | 2.6109      | 22.988      |
| 12     | 55        | M   | 2.4921      | 58.016      |
| 13     | 33        | F   | 1.8812      | 31.192      |
| 14     | 47        | F   | 1.9921      | 30.016      |
| 15     | 28        | M   | 2.1821      | 37.156      |
| 16     | 51        | M   | 1.0645      | 11.452      |
| 17     | 46        | F   | 1.1991      | 11.788      |
| 18     | 51        | F   | 1.5803      | 16.352      |
| 19     | 63        | M   | 5.4581      | 40.740      |
| 20     | 46        | F   | 4.2353      | 53.816      |

211

212 **Supplemental Table 2. Primers for tail PCR genotyping.**

| Gene                        | Primers                              | Product length              |
|-----------------------------|--------------------------------------|-----------------------------|
| <i>Rest<sup>fl/fl</sup></i> | F1: 5'-AGAGACGCTCAACTATCACCTTC-3'    | 218 bp ( <i>Rest-flox</i> ) |
|                             | R1: 5'-GACAAGAGAACAACCTTGCACCCATA-3' | 150 bp (WT)                 |
| <i>Cdh16-</i>               | F2: 5'- GCAGATCTGGCTCTCCAAAG -3'     | 420 bp                      |
| <i>Cre</i>                  | R2: 5'- AGGCAAATTTTGGTGTACGG -3'     |                             |

213

214 **Supplemental Table 3. The sequence sets for siRNA.**

| Primer name |                   | Primer Sequence (5'-3')  |                         |
|-------------|-------------------|--------------------------|-------------------------|
| human       | <i>REST-si-1</i>  | Sense (5'-3')            | GCAAGAGCUCGAAGACCAAdTdT |
|             |                   | Antisense (5'-3')        | UUGGUCUUCGAGCUCUUGCdTdT |
|             | <i>REST-si-2</i>  | Sense (5'-3')            | GAGCGAGUCUACAAGUGUAdTdT |
|             |                   | Antisense (5'-3')        | UACACUUGUAGACUCGCUCdTdT |
|             | <i>REST-si-3</i>  | Sense (5'-3')            | AGUUCACAGUGCUAAGAAAdTdT |
|             |                   | Antisense (5'-3')        | UUUCUUAGCACUGUGAACUdTdT |
| mouse       | <i>Gclm-si-1</i>  | Sense (5'-3')            | GAAGAUAAAUCCCGAUGAAdTdT |
|             |                   | Antisense (5'-3')        | UUCAUCGGGAUUUAUCUUCdTdT |
|             | <i>Gclm-si-2</i>  | Sense (5'-3')            | GAUUGAAGAUGGAGUUAAUdTdT |
|             |                   | Antisense (5'-3')        | AUUAACUCCAUCUUCAAUCdTdT |
|             | <i>Gclm-si-3</i>  | Sense (5'-3')            | GCACCUCUGAUCUAGACAAdTdT |
|             |                   | Antisense (5'-3')        | UUGUCUAGAUCAGAGGUGCdTdT |
| <i>NC</i>   | Sense (5'-3')     | UUCUCCGAACGUGUCACGUdTdT  |                         |
|             | Antisense (5'-3') | ACGUGACACGUUCGGAGAAAdTdT |                         |

215

216 **Supplemental Table 4. The primer sets for human.**

| Gene (human)   | Primers                                                                          | Product length |
|----------------|----------------------------------------------------------------------------------|----------------|
| <i>REST</i>    | Forward: 5'-CGGTTGGGGATAACAACCTTTTCA-3'<br>Reverse: 5'-TCTACGACGCTGAGT TCCAAA-3' | 127bp          |
| <i>β-actin</i> | Forward: 5'-CATGTACGTTGCTATCCAGGC-3'<br>Reverse: 5'-CTCCTTAATGTCACGCACGAT-3'     | 250bp          |
| <i>FSP1</i>    | Forward: 5'-ACAGCCAGCCCTTCCTC-3'<br>Reverse: 5'-TGCCCTCACAGACAGACAC-3'           | 143bp          |
| <i>GSS</i>     | Forward: 5'-ATGAACCCTGCCCCACT-3'<br>Reverse: 5'-AGGCTATGCCCTCCAC-3'              | 113bp          |
| <i>GCLC</i>    | Forward: 5'-AACACAGACCCAACCCAGAG-3'<br>Reverse: 5'-CCGCATCTTCTGGAAATGTT-3'       | 201bp          |
| <i>GCLM</i>    | Forward: 5'-GCCACCAGATTTGACTGCCTTT-3'<br>Reverse: 5'-CAGGGATGCTTTCTTGAAGAGCTT-3' | 119bp          |
| <i>DHFR</i>    | Forward: 5'-CAGCGAGCAGGTTCTCAT-3'<br>Reverse: 5'-ACTATGTTCCGCCACAC-3'            | 136bp          |
| <i>GPX4</i>    | Forward: 5'-TTGCCGCCTACTGAAGC-3'<br>Reverse: 5'-ATGTGCCCGTCGATGTC-3'             | 141bp          |
| <i>MMP24</i>   | Forward: 5'-CCAGGGCGTCTGAAGTG-3'<br>Reverse: 5'-GAGCGAGGTCAGCAAGG-3'             | 125bp          |
| <i>HMOX1</i>   | Forward: 5'-CTCCTCTCGAGCGTCCTCAG-3'<br>Reverse: 5'-AAATCCTGGGGCATGCTGTC-3'       | 107bp          |
| <i>RELL2</i>   | Forward: 5'-CTCATGTCGGAACCACAGCCT-3'<br>Reverse: 5'-AGGCCTCAGCATTGGCTTCA-3'      | 268bp          |
| <i>SEZ6L2</i>  | Forward: 5'- GGAGAGAGATCGGGGTGAGT-3'<br>Reverse: 5'- ATGAAGCAGTTCAGCCAGGG-3'     | 192bp          |
| <i>KCNK3</i>   | Forward: 5'- TCGTGTGCACCTTCACCTAC-3'<br>Reverse: 5'- CCCTGGCTGAGGTTGTAGC-3'      | 136bp          |
| <i>SNAP25</i>  | Forward: 5'- ACCAGTTGGCTGATGAGTCG-3'<br>Reverse: 5'- ACACGATCGAGTTGTTCTCCT-3'    | 124bp          |
| <i>RTN2</i>    | Forward: 5'-TTTGTCCCACCAGATCACC-3'<br>Reverse: 5'-GAAGATGGCACCCACGA-3'           | 132bp          |
| <i>SPINK1</i>  | Forward: 5'-GTGCGGTGCAGTTTTTCA-3'<br>Reverse: 5'-TTCCATCAGTCCCACAGAC-3'          | 199bp          |
| <i>TRIM16</i>  | Forward: 5'-GAGCCTATGGGGTTCAGAT-3'<br>Reverse: 5'-CAGCCAGATGCGATGAC-3'           | 132bp          |

217

218 **Supplemental Table 5. The primer sets for mouse.**

| Gene (mouse)   | Primers                                                                         | Product length |
|----------------|---------------------------------------------------------------------------------|----------------|
| <i>β-actin</i> | Forward: 5'-TGTTACCAACTGGGACGACA-3'<br>Reverse: 5'-GGGGTGTGGAAGGTCTCAA-3'       | 165bp          |
| <i>Kim1</i>    | Forward: 5'-ACATATCGTGGAATCACAACGAC-3'<br>Reverse: 5'-ACTGCTCTTCTGATAGGTGACA-3' | 114bp          |
| <i>Ngal</i>    | Forward: 5'-GCAGGTGGTACGTTGTGGG-3'<br>Reverse: 5'-CTCTTGTAGCTCATAGATGGTGC-3'    | 95bp           |
| <i>Rest</i>    | Forward: 5'-CGGGTGAAGCCAACCAAAAAG-3'<br>Reverse: 5'-CTCTAACAGGCACCAAGCCA-3'     | 124bp          |
| <i>FSP1</i>    | Forward: 5'-GCCTTGCCCTTCTCACA-3'<br>Reverse: 5'-GCTGGATCTGCTTACCA-3'            | 127bp          |
| <i>Gss</i>     | Forward: 5'-CTCCGACGTGGTGACGTA-3'<br>Reverse: 5'-GGGTAAGGTGAGGGGAAA-3'          | 52bp           |
| <i>Gpx4</i>    | Forward: 5'-TTCTCAGCCAAGGACATCG-3'<br>Reverse: 5'-CACTCAGCATATCGGGCAT-3'        | 149bp          |
| <i>Gclm</i>    | Forward: 5'-GCCTTACAAGAAGCATCCC-3'<br>Reverse: 5'-GCCCTCAA ACTCAACACA-3'        | 65bp           |
| <i>Gclc</i>    | Forward: 5'-GCACGTTGCTCATCTCTTT-3'<br>Reverse: 5'-TCAGACTCGTTGGCATCA-3'         | 81bp           |
| <i>Dhfr</i>    | Forward: 5'-CTCAGGGCTGCGATTTC-3'<br>Reverse: 5'-ACGATGCAGTTCAATGGTC-3'          | 104bp          |
| <i>Hmox1</i>   | Forward: 5'-CCTCACAGATGGCGTCACTT-3'<br>Reverse: 5'-TGGGGGCCAGTATTGCATTT-3'      | 200bp          |
| <i>Rell2</i>   | Forward: 5'-GCAACGCGAGTAGGCATT-3'<br>Reverse: 5'-AGGATGTGGGCCGGTAG-3'           | 120bp          |
| <i>Mmp24</i>   | Forward: 5'-CTGTCCCTCTGCCTCCTG-3'<br>Reverse: 5'-GGGCTGCTCATAACCCACT-3'         | 115bp          |
| <i>Sez6l2</i>  | Forward: 5'-CCTTTCCCTCCCACTTT-3'<br>Reverse: 5'-AGGTTATCCCTTGTTCGG-3'           | 77bp           |
| <i>Trim16</i>  | Forward: 5'-CCGGTCTATGCTGCTTTC-3'<br>Reverse: 5'-CCTCTCCAGATCCACAA-3'           | 67bp           |
| <i>Snap25</i>  | Forward: 5'-ACGAAGCACCCTGACTTG-3'<br>Reverse: 5'-CCCTCCTCTGCATCTCCT-3'          | 106bp          |
| <i>Rtn2</i>    | Forward: 5'-CCACACCCTCTCCCACTC-3'<br>Reverse: 5'-GGGCAGCGTCTGACTAT-3'           | 150bp          |
| <i>Spink1</i>  | Forward: 5'-TTCTTCTCAGTGCTTTGGC-3'<br>Reverse: 5'-ATTCCGTCAGTCCCACAC-3'         | 139bp          |
| <i>Kcnk3</i>   | Forward: 5'-CTACCTGCAACCCAGTGGAG-3'<br>Reverse: 5'-CCATAGCCCCACACATACCC-3'      | 90bp           |

220 **Supplemental Table 6. The primer sets for rat.**

| Gene (rat)     | Primers                             | Product length |
|----------------|-------------------------------------|----------------|
| <i>β-actin</i> | Forward: 5'-CGCGAGTACAACCTTCTTGC-3' | 81bp           |
|                | Reverse: 5'-CGCAGCGATATCGTCATCCA-3' |                |
| <i>Rest</i>    | Forward: 5'-CGGACGCCGGTAGCGA-3'     | 168bp          |
|                | Reverse: 5'-ATAATGAGCTGAGGTGCCGC-3' |                |

221

222

223 **Supplemental Table 7. The sequence sets for shRNA.**

| Primer name      | Primer Sequence (5'-3')                                                            |
|------------------|------------------------------------------------------------------------------------|
| <i>GPX4-sh-1</i> | Sense (5'-3')<br>CCGGAAGGACATCGACGGGCACATGCTCG<br>AGCATGTGCCCGTCG ATGTCCTTTTTTTG   |
|                  | Antisense (5'-3')<br>AATTCAAAAAAGGACATCGACGGGCAC<br>ATGCTCGAGCATGTGCCCGTCGATGTCCTT |
| <i>GPX4-sh-2</i> | Sense (5'-3')<br>CCGGAAGAGATCAAAGAGTTCGCCGCTCG<br>AGCGGCGAACTCTTTGATCTCTTTTTTTG    |
|                  | Antisense (5'-3')<br>AATTCAAAAAAGAGATCAAAGAGTTCGC<br>CGCTCGAGCGGCGAACTCTTTGATCTCTT |
| <i>GPX4-sh-3</i> | Sense (5'-3')<br>CCGGAAGCGCTACGGACCCATGGAGCTCG<br>AGCTCCATGGGTCCGTAGCGCTTTTTTTG    |
|                  | Antisense (5'-3')<br>AATTCAAAAAAGCGCTACGGACCCATGG<br>AGCTCGAGCTCCATGGGTCCGTAGCGCTT |

224

225

226 **Supplemental Table 8. Putative binding sequences of REST in *GCLM* promoter region.**

227

| Name | Start | End  | Strand | Predicted sequence     |
|------|-------|------|--------|------------------------|
| REST | 76    | 96   | -      | TACTACTACCACTGACAGTGTA |
| REST | 370   | 390  | -      | GTTTCATGTCCTTTGTAGGGAA |
| REST | 1750  | 1768 | -      | TGACCGCCAGGGGGAGCCC    |
| REST | 1849  | 1869 | -      | GCCGCAGGCCAAGGGCCAGTC  |

228

229

230 **Supplemental Table 9. The primer sets for ChIP.**

| Gene        | Primers                             | Product length |
|-------------|-------------------------------------|----------------|
| <i>GCLM</i> | Forward: 5'-GCCACGCTCTCTCGACC-3'    | 161bp          |
|             | Reverse: 5'-AGCCGAGAAAGTGCTTCGTA-3' |                |

231



232 **3. Supplemental Figures**

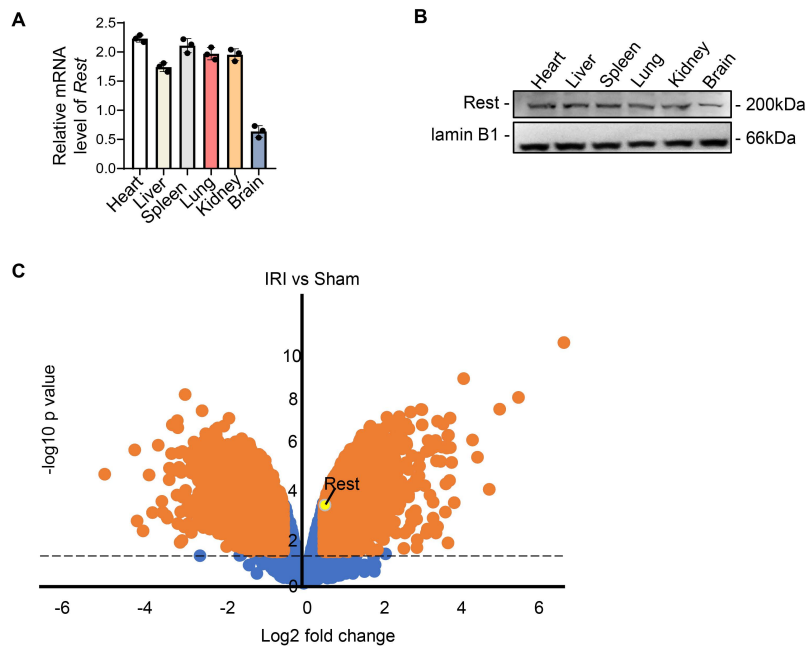

233

234 **Supplemental Figure 1. REST Expression in major organs and the renal tubules**  
235 **from sham and AKI mice. (A and B) qPCR (A) and Western blot (B) analysis of**  
236 **REST expression levels in different organs. (C) Volcano plot of sham and IRI-induced**  
237 **AKI (GSE52004).**

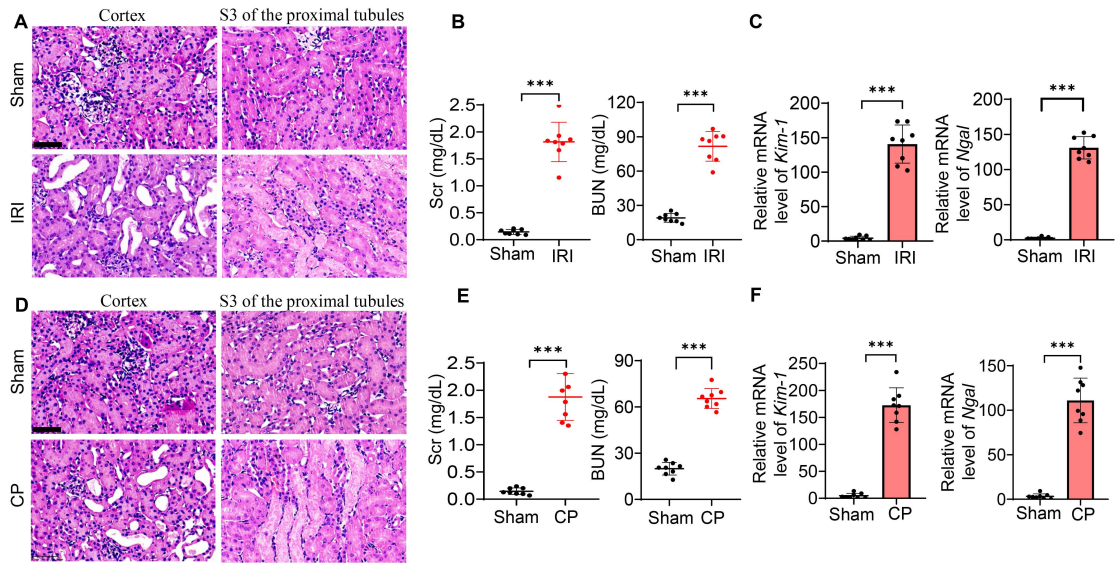

238

239

240

241

242

243

**Supplemental Figure 2. Establishment of IRI-induced AKI and cisplatin-induced AKI.** (A-F) Representative HE staining (A and D), serum levels of Scr and BUN (B and E) and the levels of *Kim-1* and *Ngal* (C and F) in IRI-induced and cisplatin-induced AKI. Scale bar: 50  $\mu$ m, (n = 8 mice per group). Data shown are mean  $\pm$  SD and analyzed by two-tailed unpaired Student's t-test (B, C, E and F). \*\*\*  $P < 0.001$ .

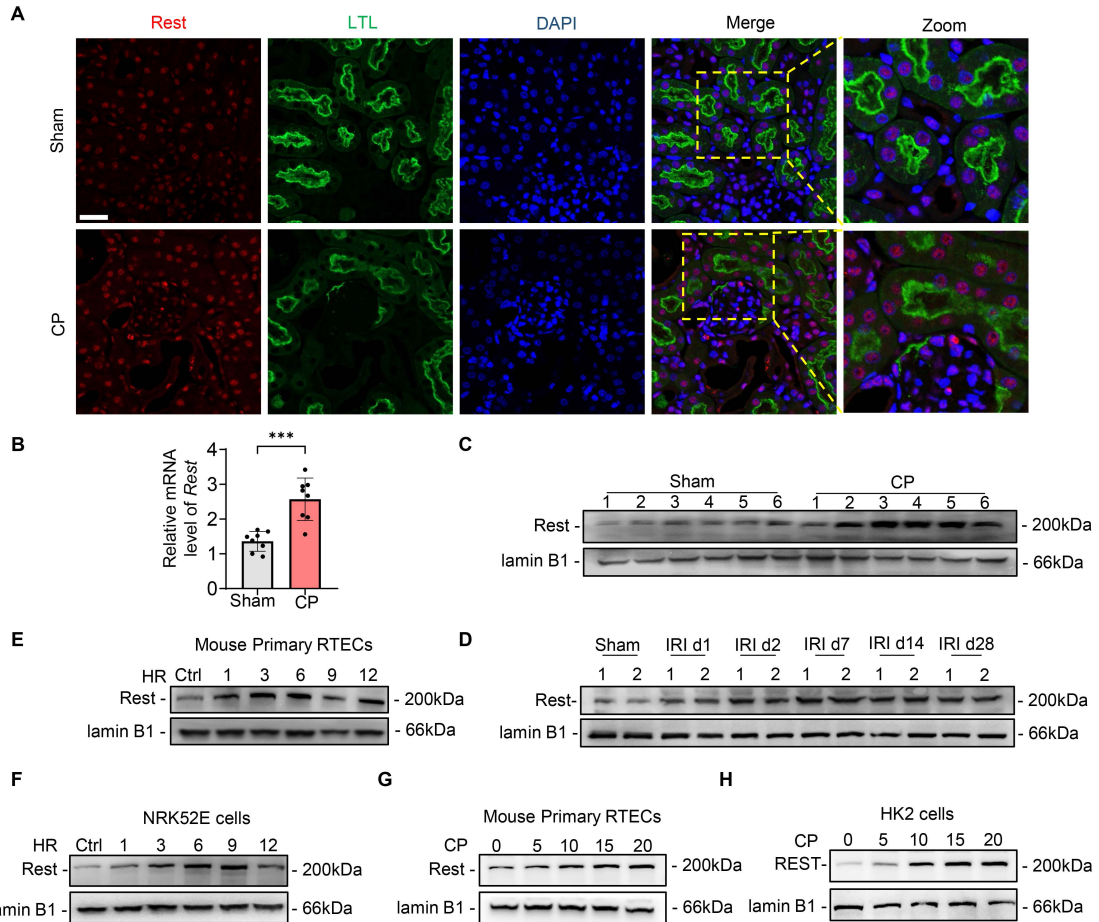

244

245

246

247

248

249

250

251

252

253

254

**Supplemental Figure 3. Rest is upregulated in renal tubules from mice with AKI and AKI-to-CKD.** (A-C) immunofluorescence staining (A), qPCR (B) and Western blot analysis (C) of Rest in cisplatin-induced AKI group. Scale bar: 50  $\mu$ m, (n = 8 mice per group). (D) Protein level of Rest after IRI 1, 3, 7, 14 and 28 days in mice. (E and F) Western blot analysis of Rest in primary renal tubular epithelial cells of mouse (mouse primary RTECs) (E) and NRK52E cells (F) after 24 hours of hypoxia and subsequent different reoxygenation duration time. (G and H) Western blot of REST in HK2 (G) and mouse primary RTECs (H) treated with a concentration gradient of cisplatin. Data were shown as mean  $\pm$  SD and analyzed by two-tailed unpaired Student's t-test (B). \*\*\*  $P < 0.001$ .

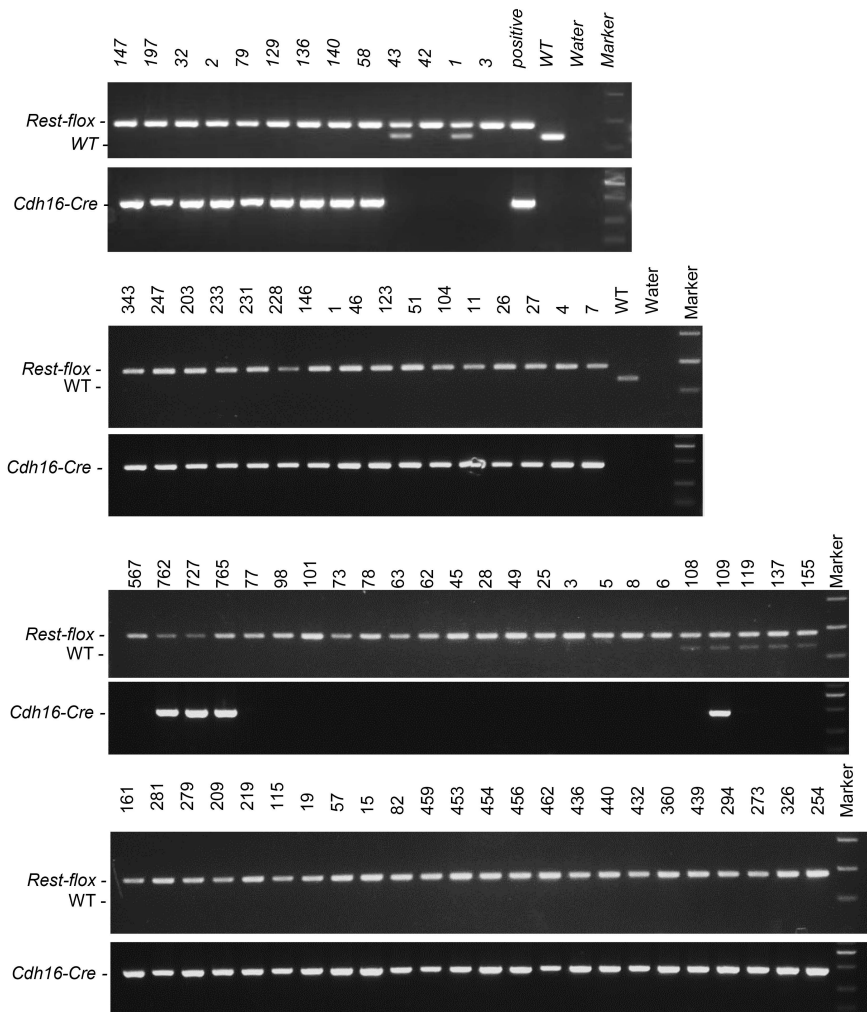

255

256

**Supplemental Figure 4. Genetic identification of *Rest* conditional knockout mice.**

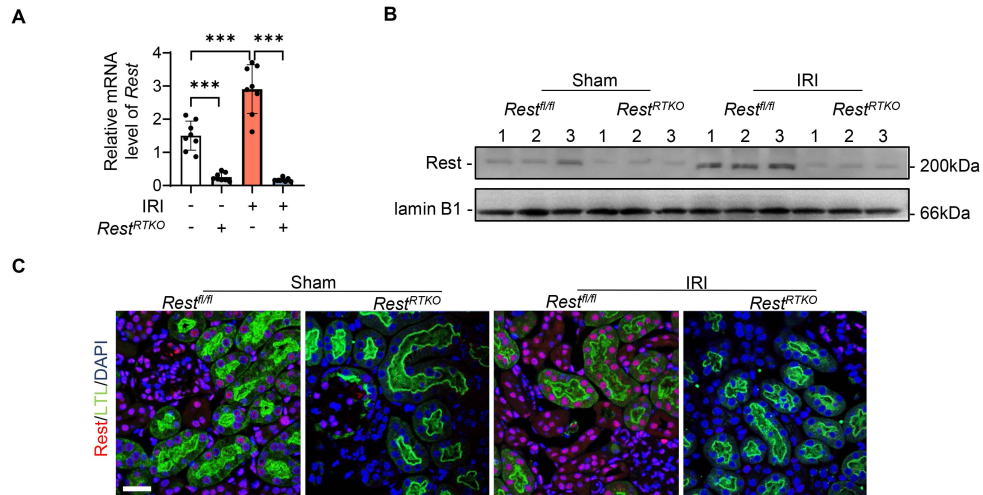

257

258 **Supplemental Figure 5. Identification of *Rest* conditional knockout mice. (A-C)**  
 259 The qPCR(A), Western blot analyses (B) and immunofluorescent analyses (C) of *Rest*  
 260 in *Rest<sup>fl/fl</sup>* and *Rest<sup>RTKO</sup>* mice with or without IRI. Scale bar: 50  $\mu$ m. (n = 8 mice per  
 261 group). Data shown are mean  $\pm$  SD and analyzed by one-way ANOVA. \*\*\*  $P <$   
 262 0.001.

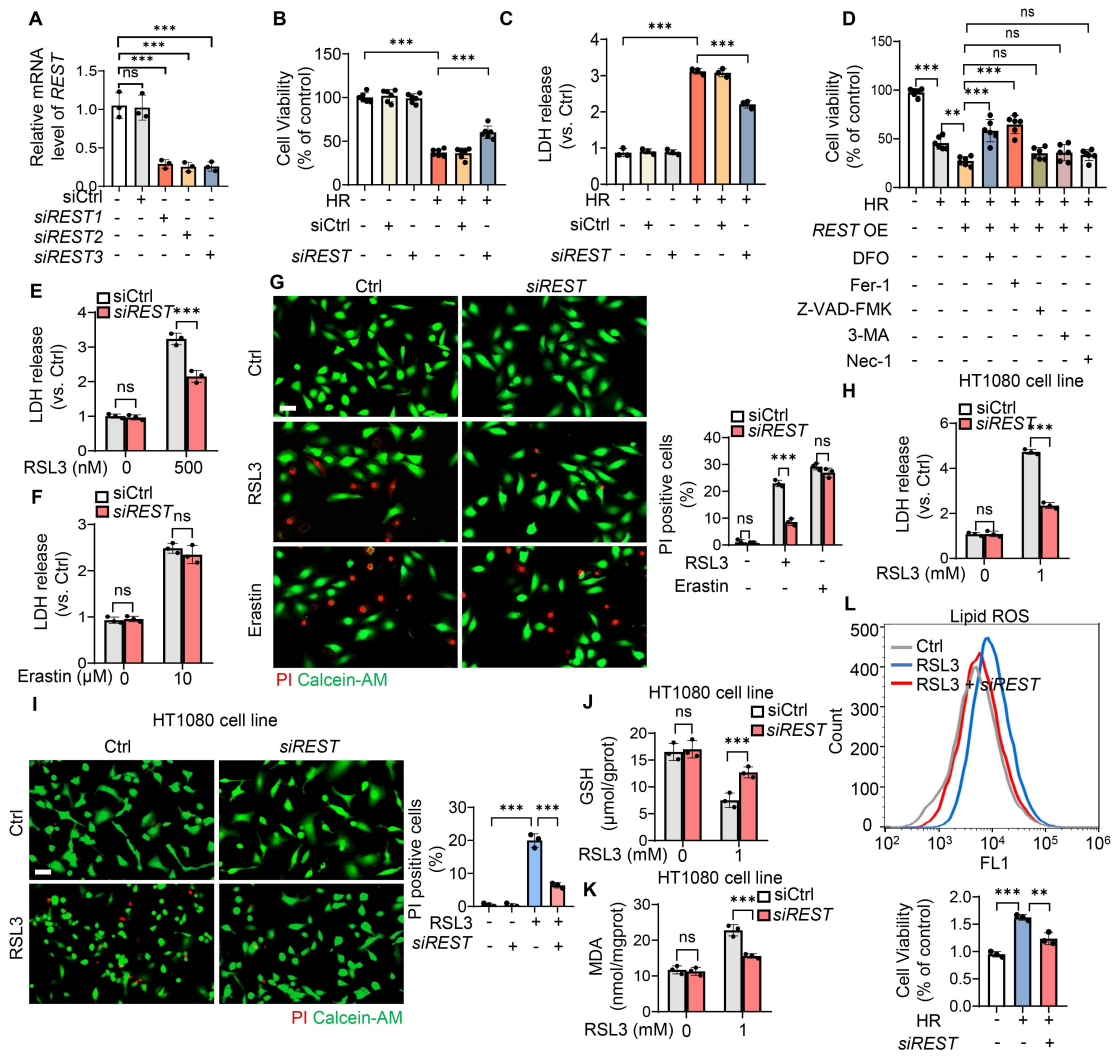

263  
 264  
 265  
 266  
 267  
 268  
 269  
 270  
 271  
 272  
 273  
 274  
 275  
 276  
 277  
 278

**Supplemental Figure 6. *REST* knockdown improves cell viability and inhibits ferroptosis.** (A) mRNA of *REST* after conducted with control or siRNAs against *REST* (*siREST*). (n = 3). (B and C) Cell viability (B) and LDH release (C) of HK2 cells under normoxia or HR injury transfected with control or *siREST*. (n = 3). (D) HK2 cells were transfected with *REST* overexpression plasmids and incubated with deferoxamine (DFO) (100 μM), ferrostatin-1(fer-1) (1 μM), Z-VAD (10 μM), 3-Methyladenine (3-MA) (3 mM) or necrostatin-1(*nec-1*) (10 μM) respectively under HR condition, and then cell viability was detected. (n = 3). (E-G) HK2 cells were transfected with *siREST* or control and incubated with RSL3 (0.5 μM) or Erastin (10 μM). Then LDH release and PI/Calcein-AM staining were detected. (n = 3). (H-L) HT1080 cells were transfected with control or *siREST*, and then cultured normally or incubated with RSL3(1 μM) for detection of LDH (H), PI/Calcein-AM (I), GSH (J), MDA (K), and lipid ROS (L). (n = 3). Data shown are mean ± SD and analyzed by two-tailed unpaired Student's t-test (E-H, J and K) and one-way ANOVA (A-D, I and L). \*  $P < 0.05$ , \*\*  $P < 0.01$ , \*\*\*  $P < 0.001$ , ns: no significance.

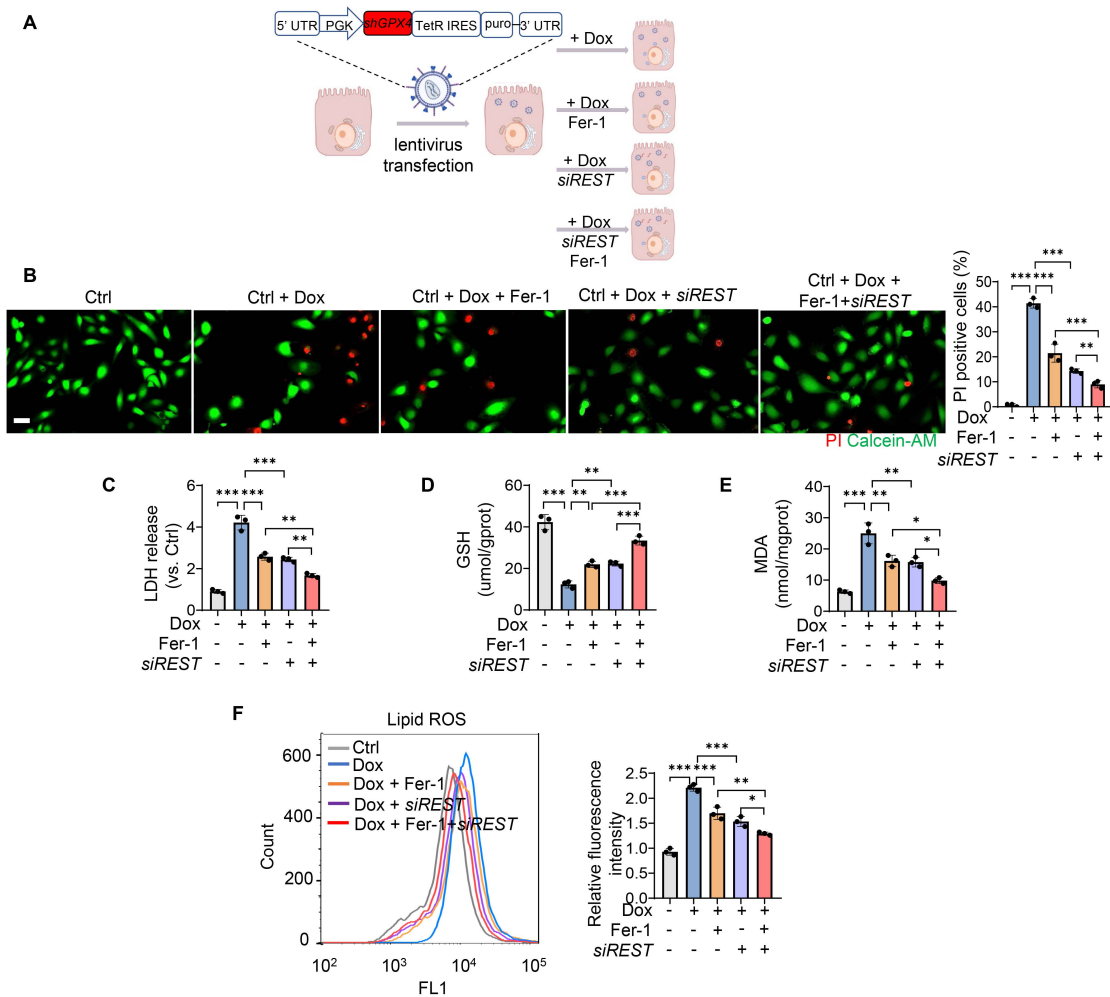

279

280 **Supplemental Figure 7. Knockdown of *REST* can overcome ferroptosis induced**  
 281 **by *GPX4*-deficiency. (A)** HK2 cells were infected with lentivirus which can  
 282 knockdown *GPX4* by doxycycline (Dox) treatment. Then they were divided into five  
 283 groups: (1) Ctrl group was cultured normally, (2) Dox group was incubated with Dox,  
 284 (3) Dox+Fer-1 group was co-incubated with Dox and fer-1, (4) Dox+siREST group  
 285 was transfected with siRNAs against REST for 48 h and then added with Dox, (5)  
 286 Dox+Fer-1+siREST group was transfected with siRNAs against REST for 48 h and  
 287 then added with Dox and Fer-1. (B-F) these cells were used to observe PI/Calcein-  
 288 AM staining (B), LDH release(C), GSH production (D), MDA levels (E) and lipid  
 289 ROS accumulation (F). Data shown are mean  $\pm$  SD and they were analyzed by one-  
 290 way ANOVA (B-F). (n = 3). \*  $P < 0.05$ , \*\*  $P < 0.01$ , \*\*\*  $P < 0.001$ .  
 291

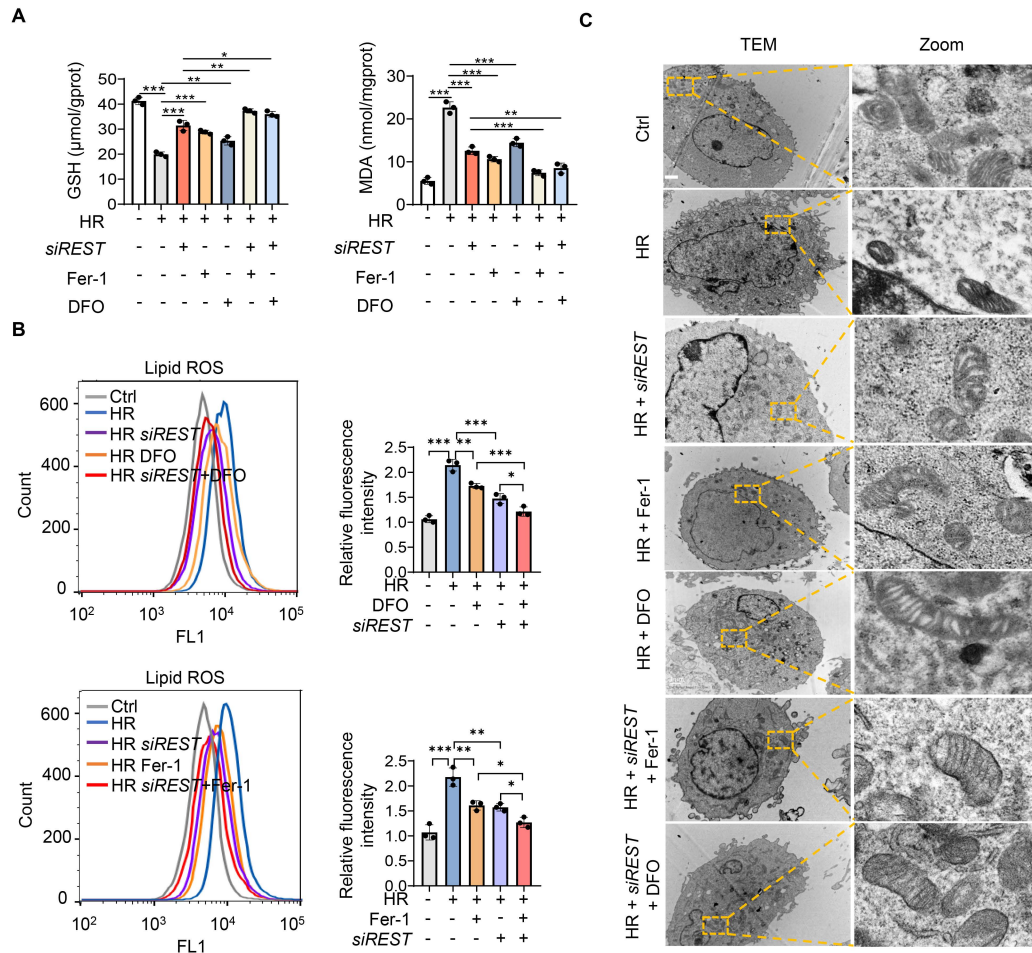

292

293

**Supplemental Figure 8. REST-deficiency has additional benefits on**

294

**deferoxamine and ferrostatin-1 to attenuate ferroptosis.** HK2 cells were incubated

295

with DFO or Fer-1 separately with control or *siREST* transfection, and then exposed

296

to HR injury. Then they were used to detect GSH and MDA levels (A), lipid ROS

297

accumulation (B), and TEM observations (C). (n = 3). Data shown are mean ± SD and

298

analyzed by one-way ANOVA (A and B). \*  $P < 0.05$ , \*\*  $P < 0.01$ , \*\*\*  $P < 0.001$ , ns:

299

no significance.



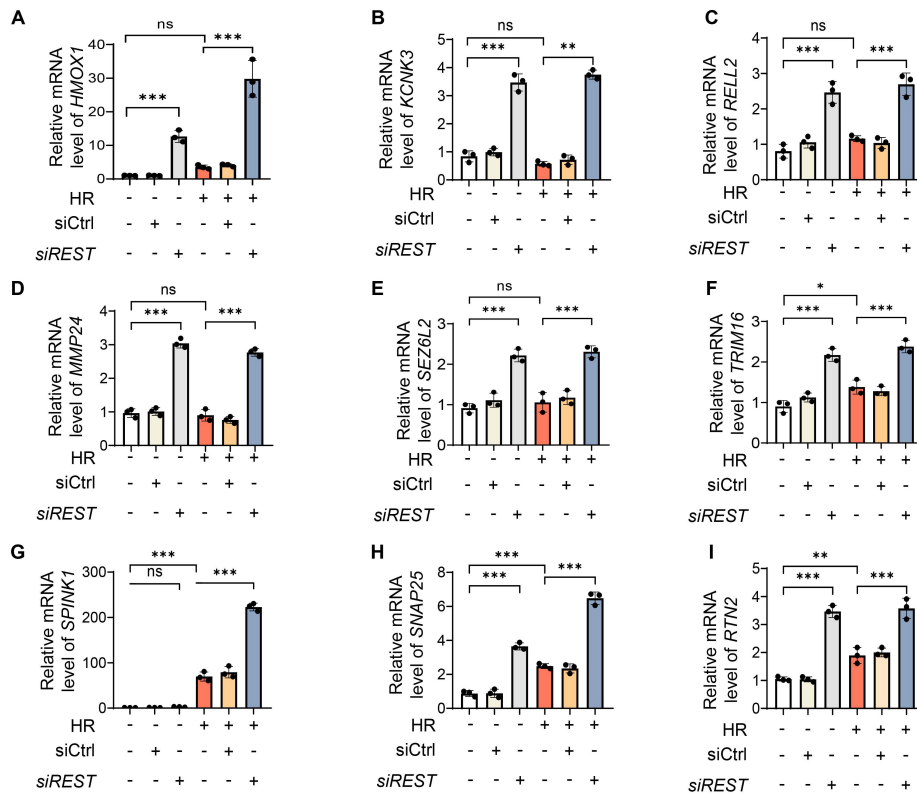

300

301 **Supplemental Figure 9. Screen of top ten upregulated genes in HK2 cells with**  
 302 ***REST* knockdown. qPCR of the top ten upregulated genes except *GCLM* in RNA-seq**  
 303 **after *REST* was knockdown in HK2 cells under HR condition (A-I). (n = 3). Data**  
 304 **shown are mean ± SD and analyzed by one-way ANOVA (A-I). \*  $P < 0.05$ , \*\*  $P <$**   
 305 **0.01, \*\*\*  $P < 0.001$ , ns: no significance.**

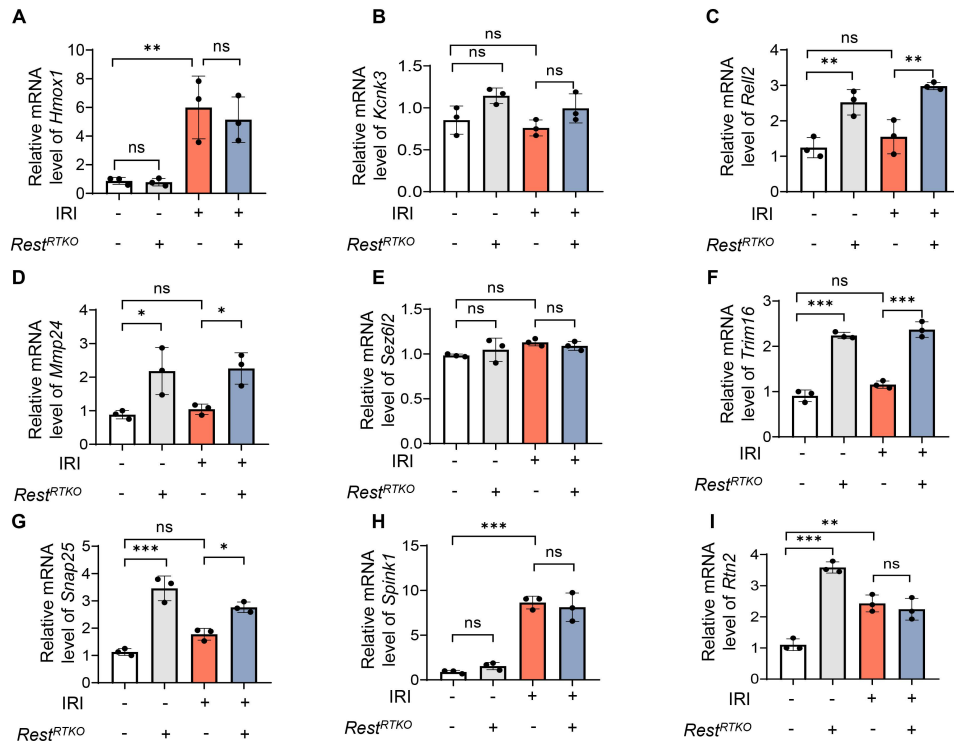

306

307 **Supplemental Figure 10. Screen of top ten upregulated genes in *Rest<sup>RTKO</sup>* mice.**

308 qPCR of the top ten upregulated genes except *GCLM* in RNA-seq from renal tubules

309 in *Rest<sup>RTKO</sup>* mice of IRI-induced AKI (A-I). Data shown are mean  $\pm$  SD and analyzed

310 by one-way ANOVA (A-I). (n = 3). \*  $P < 0.05$ , \*\*  $P < 0.01$ , \*\*\*  $P < 0.001$ , ns: no

311 significance.

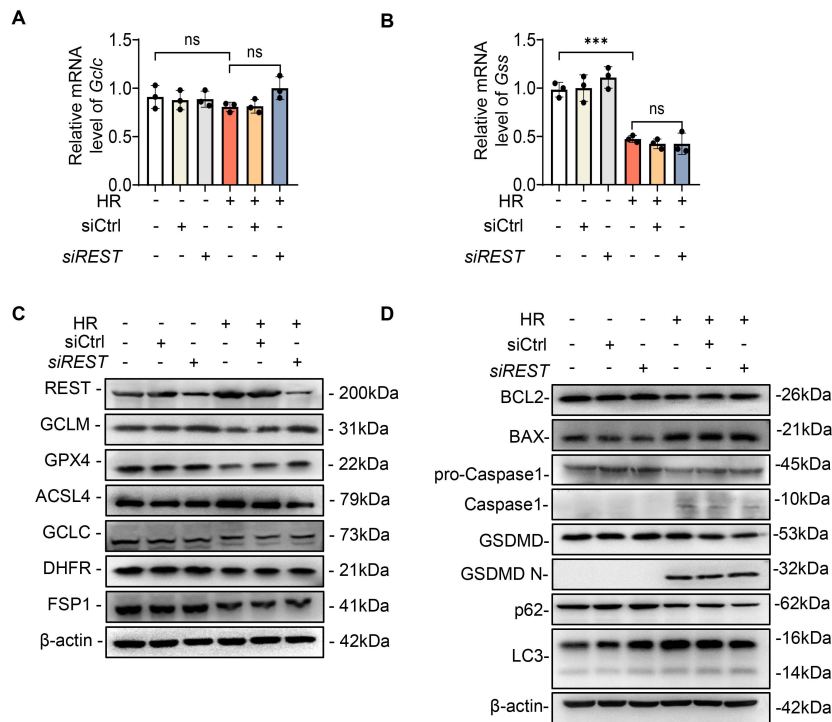

312

313 **Supplemental Figure 11. Knockdown of *REST* has no effect on other ferroptosis-**

314 **related genes or other major forms of cell death.** HK2 cells were transfected with

315 control or *siREST*, and then exposed to HR injury. (A and B) Represented relative

316 mRNA levels of *GCLC* (A) and *GSS* (B) between different groups. (n = 3). (C)

317 Western blot analyses of the protein levels of REST, GCLM, GPX4, ACSL4, GCLC,

318 DHFR and FSP1 in different groups. (D) Western blot analyses of the protein levels

319 of Bcl-2, Bax, Caspase-1, GSDMD, LC3 and P62 in different groups. Data shown are

320 mean  $\pm$  SD and they were analyzed by one-way ANOVA (A and B). \*\*\*  $P < 0.001$ ,

321 ns: no significance.

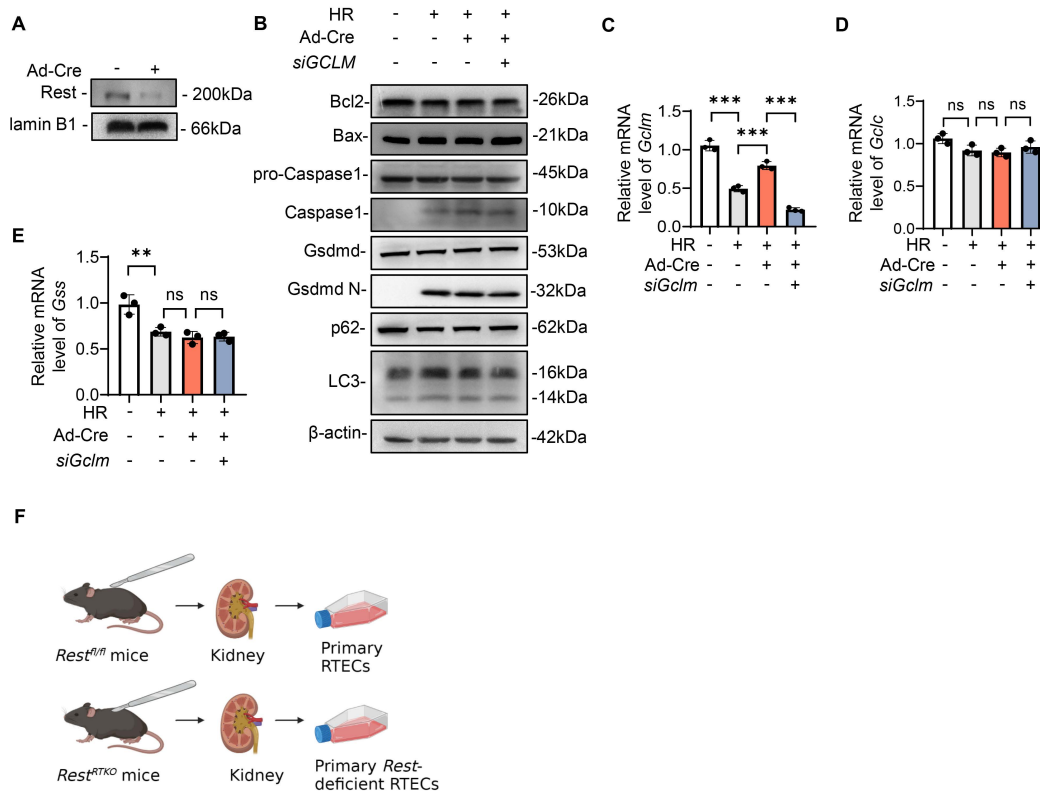

322

323 **Supplemental Figure 12. Knockdown of *Gclm* has no effect on other major forms**  
 324 **of cell death in REST-deficiency cells under HR condition. (A)** The protein level  
 325 of Rest after Ad-Cre Adenovirus infection in primary RTECs. **(B-E)** Primary RTECs  
 326 from *Rest*<sup>fl/fl</sup> mice were infected with Ad-Cre Adenovirus and transfected with  
 327 siRNAs against *GCLM*, and then exposed to HR injury. Cells were collected to detect:  
 328 protein levels of Bcl2, Bax, Caspase-1, Gsdmd, LC3 and p62 **(B)**, mRNA levels of  
 329 *Gclm* **(C)**, *Gclc* **(D)** and *Gss* **(E)**. (n = 3). **(F)** Primary REST-deficient RTECs were  
 330 isolated and cultured from *Rest*<sup>RTKO</sup> mice. Data shown are mean ± SD and they were  
 331 analyzed by one-way ANOVA **(C-E)**. \*\* *P* < 0.01, \*\*\* *P* < 0.001, ns: no significance.

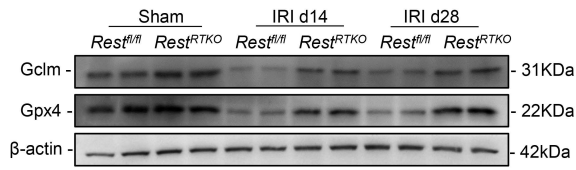

332

333 **Supplemental Figure 13. Renal tubular epithelial cell-specific knockout of *Rest***  
 334 **restores the expressions of Gclm and Gpx4 in AKI-to-CKD mice.** Western blot  
 335 analysis of the expressions of Gclm and Gpx4 in the kidneys from *Rest<sup>fl/fl</sup>* and  
 336 *Rest<sup>RTKO</sup>* mice with or without IRI on reperfusion day 14 and day 28. (n = 8 mice per  
 337 group).

338 **4. References**

- 339 1. Hu Z, Zhang H, Yi B, Yang S, Liu J, Hu J, et al. VDR activation attenuate  
340 cisplatin induced AKI by inhibiting ferroptosis. *Cell death & disease*.  
341 2020;11(1):73.
- 342 2. Deng F, Sharma I, Dai Y, Yang M, and Kanwar YS. Myo-inositol oxygenase  
343 expression profile modulates pathogenic ferroptosis in the renal proximal tubule.  
344 *The Journal of clinical investigation*. 2019;129(11):5033-49.
- 345 3. Liu J, Livingston MJ, Dong G, Tang C, Su Y, Wu G, et al. Histone deacetylase  
346 inhibitors protect against cisplatin-induced acute kidney injury by activating  
347 autophagy in proximal tubular cells. *Cell death & disease*. 2018;9(3):322.
- 348 4. Tang TT, Wang B, Wu M, Li ZL, Feng Y, Cao JY, et al. Extracellular vesicle-  
349 encapsulated IL-10 as novel nanotherapeutics against ischemic AKI. *Science*  
350 *advances*. 2020;6(33):eaaz0748.
- 351 5. Xiong J, Ran L, Zhu Y, Wang Y, Wang S, Wang Y, et al. DUSP2-mediated  
352 inhibition of tubular epithelial cell pyroptosis confers nephroprotection in acute  
353 kidney injury. *Theranostics*. 2022;12(11):5069-85.
- 354 6. Chung KW, Dhillon P, Huang S, Sheng X, Shrestha R, Qiu C, et al.  
355 Mitochondrial Damage and Activation of the STING Pathway Lead to Renal  
356 Inflammation and Fibrosis. *Cell Metab*. 2019;30(4):784-99 e5.

- 357 7. Wiernicki B, Maschalidi S, Pinney J, Adjemian S, Vanden Berghe T,  
358 Ravichandran KS, et al. Cancer cells dying from ferroptosis impede dendritic  
359 cell-mediated anti-tumor immunity. *Nature communications*. 2022;13(1):3676.
- 360 8. Huang Y, Wang S, Zhou J, Liu Y, Du C, Yang K, et al. IRF1-mediated  
361 downregulation of PGC1 $\alpha$  contributes to cardiorenal syndrome type 4. *Nature*  
362 *communications*. 2020;11(1):4664.
- 363 9. Huang Y, Zhou J, Wang S, Xiong J, Chen Y, Liu Y, et al. Indoxyl sulfate  
364 induces intestinal barrier injury through IRF1-DRP1 axis-mediated mitophagy  
365 impairment. *Theranostics*. 2020;10(16):7384-400.
- 366
